# Supplementary material for: Growth of FePt nanocrystals by a single bimetallic precursor [(CO)3Fe(µ-dppm)(µ-CO)PtCl2]
Source: Royal Society of Chemistry journal article supplement (doi:10.1039/b516831g), 2006-01-01
Supplement: b516831g.pdf [file b516831g.pdf]

## Growth of FePt nanocrystals by a single bimetallic precursor

### $[(\text{CO})_3\text{Fe}(\mu\text{-dppm})(\mu\text{-CO})\text{PtCl}_2]$

Hyon Min Song,<sup>a</sup> Jung Hoon Hong,<sup>a</sup> Yong Bok Lee,<sup>a</sup> Wan Seop Kim,<sup>a</sup> Youngmee Kim,<sup>b</sup> Sung-Jin Kim,<sup>b</sup>  
and Nam Hwi Hur<sup>\*a</sup>

<sup>a</sup>Center for CMR materials and Division of Electromagnetic Metrology, Korea Research Institute of Standards and Science, Yuseong P. O. Box 102, Daejeon 305-600, Korea

<sup>b</sup>Department of Chemistry, Ewha Womans University, Seoul 120-750, Korea

#### Experimental Section

##### Preparation of $[(\text{CO})_4\text{Fe}(\text{C}_6\text{H}_5)_2\text{PCH}_2\text{P}(\text{C}_6\text{H}_5)_2]$ .

To the stirred solution of bis(diphenylphosphino)methane (2.00 g, 5.20 mmol) in 50 ml of tetrahydrofuran in 125 ml round-bottomed flask at 70 °C was added diiron nonacarbonyl (1.89 g, 5.20 mmol) in 15 ml of tetrahydrofuran with a syringe. The reaction mixture was stirred for 6 hours under nitrogen atmosphere. After checking TLC for the completion of reaction, column chromatography was performed with a mixture of ethyl acetate and hexane (1:8, v/v). First eluted product was discarded and the next eluted product ( $r_f = 0.42$  in ethyl acetate/hexane (1:4, v/v)) was collected to give a pale yellow solid in 65 % yield (m.p. 174 - 177 °C) and used for the subsequent reaction without any purification. <sup>1</sup>H NMR ( $\text{CDCl}_3$ ) 3.38 (d,  $J = 9.2$  Hz,  $\text{CH}_2$ ), 7.25 (m, 10 H,  $\text{C}_6\text{H}_5$ ), 7.40 (m, 10 H,  $\text{C}_6\text{H}_5$ ); <sup>31</sup>P NMR ( $\text{CDCl}_3$ ) -20.92 ( $\text{Ph}_2\text{P}$ ), 68.14 (FeP).

##### Preparation of $[(\text{CO})_3\text{Fe}(\mu\text{-dppm})(\mu\text{-CO})\text{PtCl}_2]$ (1) [ $\text{dppm} = (\text{C}_6\text{H}_5)_2\text{PCH}_2\text{P}(\text{C}_6\text{H}_5)_2$ ].

To the stirred solution of  $[(\text{C}_6\text{H}_5)_2\text{PCH}_2\text{P}(\text{C}_6\text{H}_5)_2\text{Fe}(\text{CO})_4]$  (1.20 g, 2.17 mmol) in 30 ml of toluene in a 125 ml round-bottom flask at room temperature was added dichloro(1,5-cyclooctadiene)platinum(II) (0.82 g, 2.17 mmol). After 20 minutes of stirring, the color of solution changed from pale yellow to bright grey. The mixture was stirred for 2 hours, and then the solvent was evaporated under vacuum. Recrystallization was done with dichloromethane to give the product  $[(\text{CO})_3\text{Fe}(\mu\text{-dppm})(\mu\text{-CO})\text{PtCl}_2]$  in 73 % yield (m.p. 146 - 149 °C). <sup>1</sup>H NMR ( $\text{CDCl}_3$ )  $\delta$  3.28 (t,  $J = 5.4$  Hz, 2H,  $\text{CH}_2$ ), 7.38 (m,  $\text{C}_6\text{H}_5$ ), 7.47 (m,  $\text{C}_6\text{H}_5$ ), 7.89 (m,  $\text{C}_6\text{H}_5$ ); <sup>31</sup>P NMR ( $\text{CDCl}_3$ )  $\delta$  12.11 (dt,  $\text{PtP}_B$ ,  $J(\text{PtP}_B) = 1720$  Hz,  $J(\text{P}_A\text{P}_B) = 53.7$  Hz), 61.82 (dt,  $\text{FeP}_A$ ,  $J(\text{PtP}_A) = 31.7$  Hz); FT-IR ( $\text{cm}^{-1}$ ) 2056, 1972, 1951, 1906, 1432, 744, 692. Anal. Calcd. for  $\text{C}_{29}\text{H}_{22}\text{O}_4\text{P}_2\text{Cl}_2\text{FePt}$ : C 42.57; H 2.71. Found: C 42.52; H 2.85.

### Synthesis and characterization of FePt nanoparticles.

First, 0.95 g of  $[(\text{CO})_3\text{Fe}(\mu\text{-dppm})(\mu\text{-CO})\text{PtCl}_2]$  (**1**) (1.16 mmol) was added into 30 ml of *n*-dioctyl ether in a three-necked round-bottomed flask. The solution was heated for 15 minutes under nitrogen at 100 °C, and then oleic acid (0.25 ml, 0.79 mmol) and oleylamine (0.26 ml, 0.79 mmol) were added into the reaction mixture. The reaction temperature was increased to 220 °C and kept at that temperature for 10 minutes. Next, 1.5 ml of lithium triethylborohydride (1.0 M solution in tetrahydrofuran) was added dropwise into the mixture. The solution slowly turned to black and was further heated at 260 °C for 2 hours. Then, the reaction mixture was cooled down to room temperature with continuous stirring. After washing the resulting precipitate with ethanol, followed by centrifugation at 6000 rpm three times, about 0.185 g of FePt nanoparticles was obtained in 64 % yield. The collected particles were annealed at temperatures from 500 to 600 °C for 30 minutes in a 5 % H<sub>2</sub>/ 95 % argon atmosphere. The phase purity of the nanoparticles was confirmed using a Rigaku RAD diffractometer (12 kW) utilizing Cu K $\alpha$  radiation. The peak positions in our samples match those observed in the standard material (file JCPDS #43-1359). No other phases are detected in the annealed sample. The lattice constants of *a* and *c* were refined yielding values of 3.992(4) and 3.832(6) Å, respectively. Low and high resolution TEM was performed using a JEOL JEM - 4010 electron microscope with a 400 kV accelerating voltage. Temperature- and field-dependent magnetization measurements were carried out using a SQUID MPMS magnetometer (Quantum Design).

**Table S1.** Crystallographic Data of  $[(\text{CO})_3\text{Fe}(\mu\text{-dppm})(\mu\text{-CO})\text{PtCl}_2]$  (**1**).

|                                                |                                                                                                 |
|------------------------------------------------|-------------------------------------------------------------------------------------------------|
| Formula                                        | $\text{C}_{29}\text{H}_{22}\text{O}_4\text{P}_2\text{Cl}_2\text{FePt}$                          |
| Formula weight                                 | 818.27                                                                                          |
| Temperature (K)                                | 293(2)                                                                                          |
| Crystal size (mm)                              | 0.20 x 0.17 x 0.10                                                                              |
| Crystal color                                  | pale yellow                                                                                     |
| Crystal description                            | block                                                                                           |
| Crystal system                                 | monoclinic                                                                                      |
| Space group                                    | $P2_1/n$ (SG No. 14), $Z = 4$                                                                   |
| Dimension ( $\text{\AA}$ , °, $\text{\AA}^3$ ) | $a = 12.535(1)$<br>$b = 17.662(1)$<br>$c = 13.211(1)$<br>$\beta = 102.17(0)$<br>$V = 2859.2(7)$ |
| Calculated density ( $\text{g/cm}^3$ )         | 1.901                                                                                           |
| Radiation                                      | 0.71073 (Mo $K\alpha$ )                                                                         |
| $2\theta$ range (°)                            | $3.9 < 2\theta < 52.1$                                                                          |
| $R_1^a [I > 2\sigma(I)]$                       | 0.0294                                                                                          |
| $wR_2^b [I > 2\sigma(I)]$                      | 0.0561                                                                                          |
| $R_1$ [for all]                                | 0.0447                                                                                          |
| $wR_2$ [for all]                               | 0.0571                                                                                          |
| Goodness-of-fit                                | 0.948                                                                                           |
| $(\Delta/\sigma)_{\text{max}}$ final cycle     | 0.002                                                                                           |
| Residual density (e. $\text{\AA}^{-3}$ )       | 1.212/-1.014                                                                                    |
| No. of reflections collected                   | 15966                                                                                           |
| No. of reflections used                        | 5624 [ $> 2\sigma(I)$ ]                                                                         |
| No. of parameters                              | 353                                                                                             |
| Diffractionmeter                               | Bruker APEX CCD                                                                                 |
| Monochromator                                  | graphite                                                                                        |
| Structure determination                        | SHELXS-97 and SHELXL-97                                                                         |
| Refinement                                     | Full-matrix least-squares on $F^2$                                                              |

<sup>a</sup>  $R_1(F) = \Sigma(|F_o| - |F_c|)/\Sigma(|F_o|)$ .

<sup>b</sup>  $wR_2(F^2) = [\Sigma[w(F_o^2 - F_c^2)]^2/\Sigma[w(F_o^2)^2]]^{1/2}$ ,  $w = 1/[\sigma^2(F_o^2) + (xP)^2 + yP]$ , where  $P = (\text{Max}(F_o^2, 0) + 2 F_c^2)/3$ .

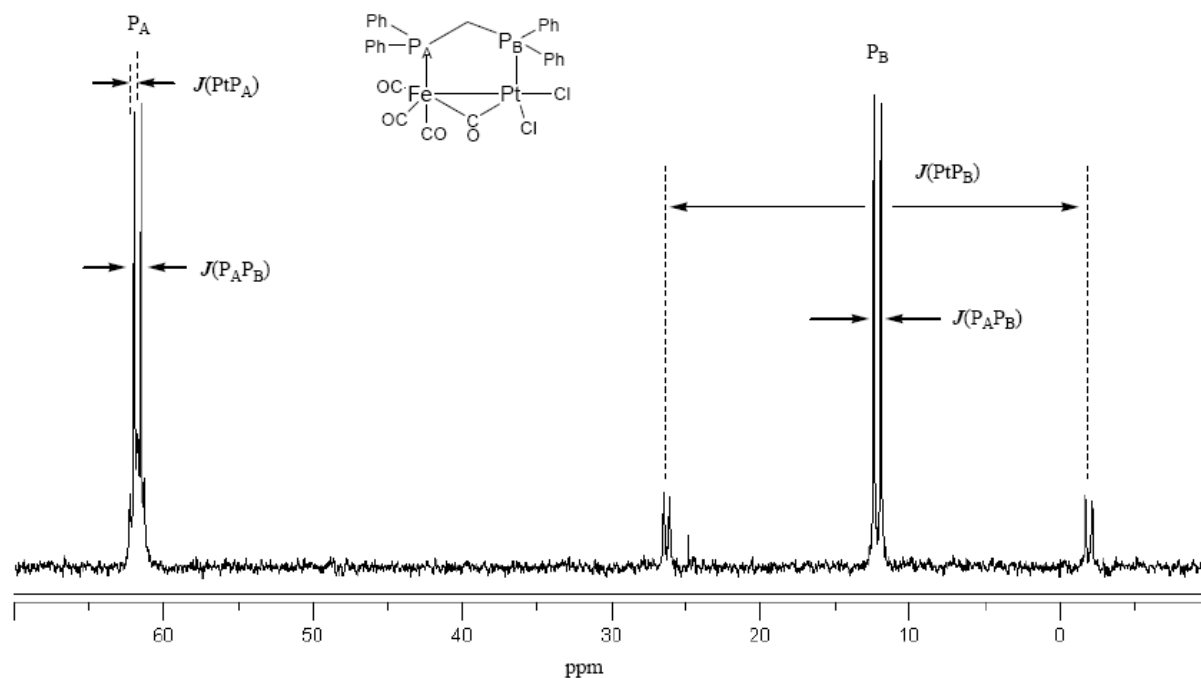

**Figure S1.**  $^{31}\text{P}$  NMR spectrum of  $[(\text{CO})_3\text{Fe}(\mu\text{-dppm})(\mu\text{-CO})\text{PtCl}_2]$  (**1**) in  $\text{CDCl}_3$ .

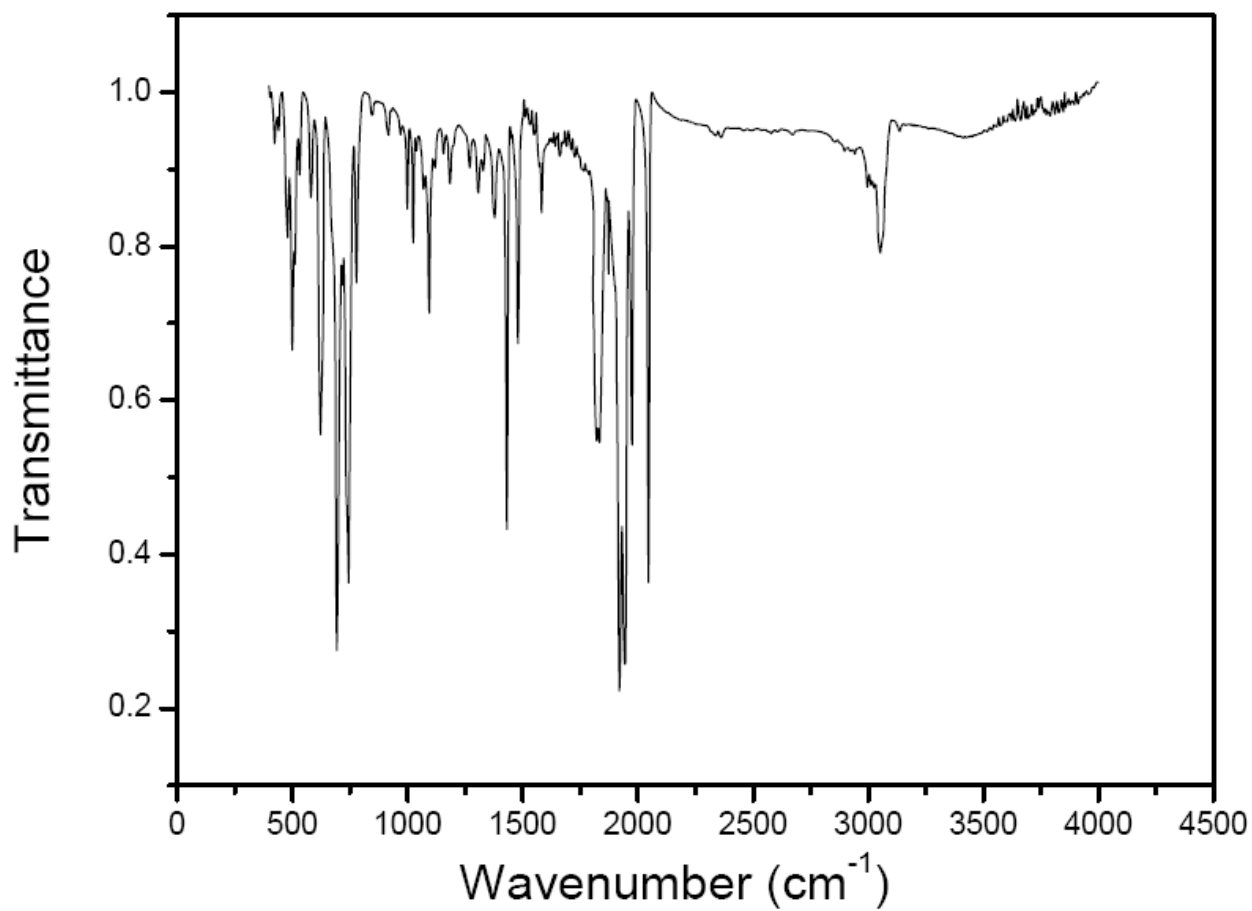

**Figure S2.** FT-IR spectrum of  $[(\text{CO})_3\text{Fe}(\mu\text{-dppm})(\mu\text{-CO})\text{PtCl}_2]$  (**1**).

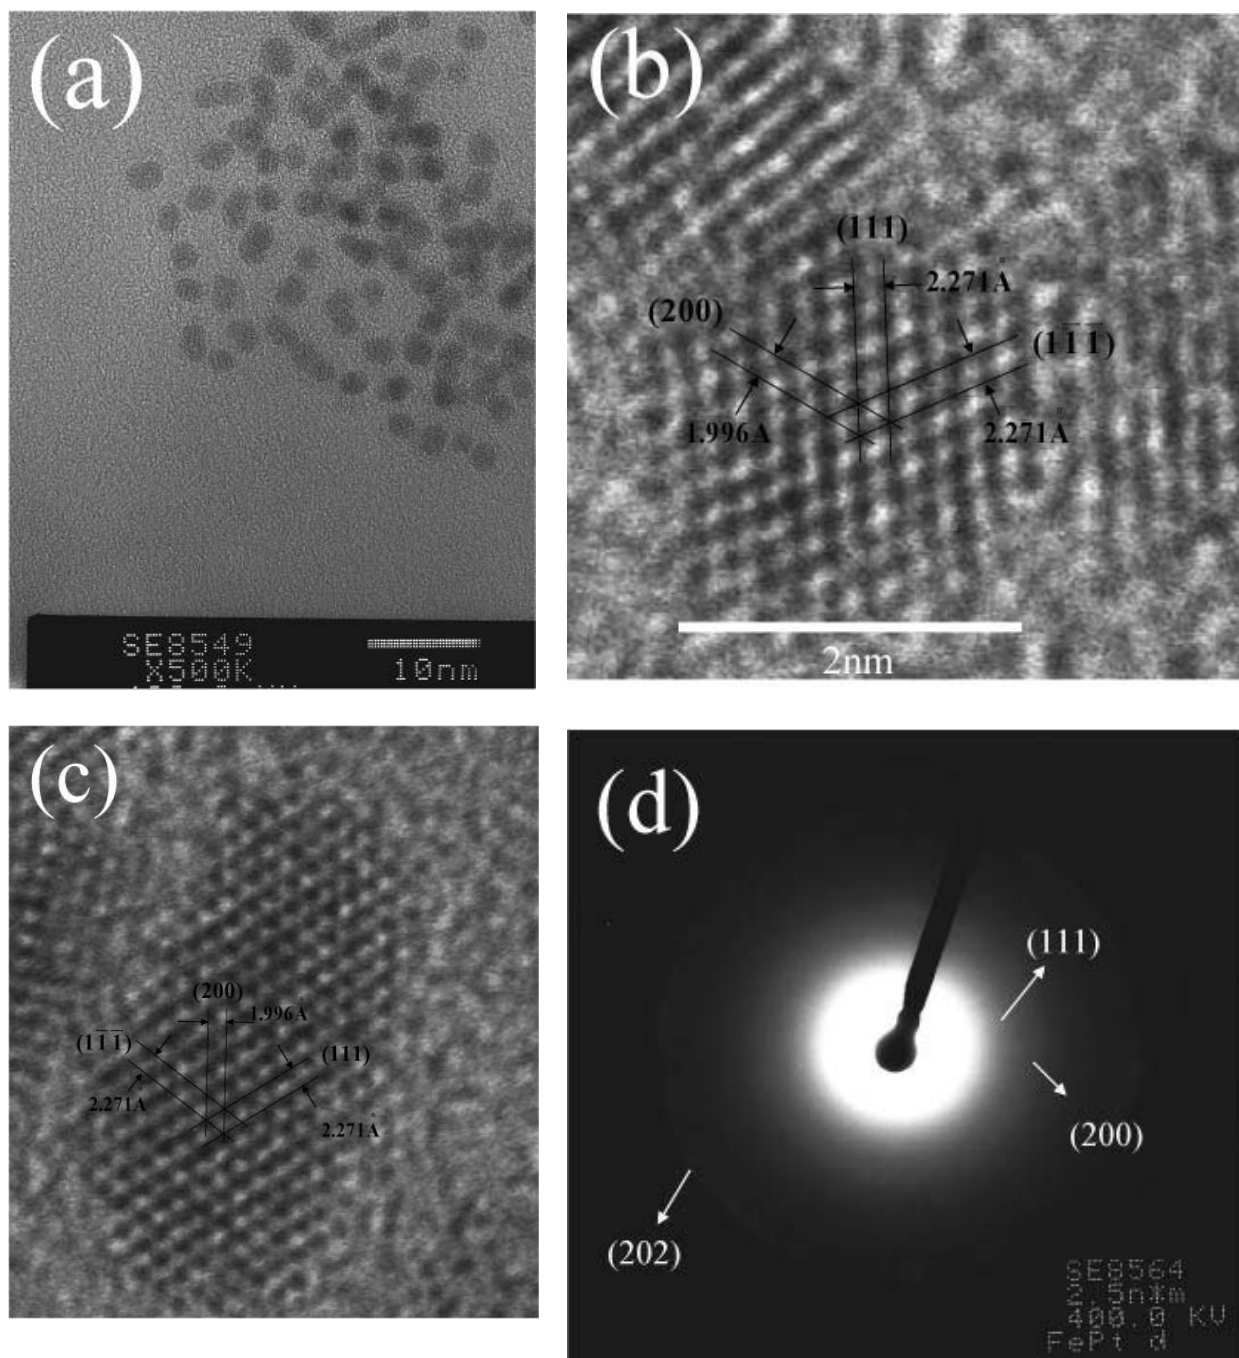

**Figure S3.** (a) Low resolution TEM micrograph of as-synthesized FePt nanocrystals. High resolution TEM images of the same sample are in (b) and (c). (d) SAED pattern of the same FePt nanocrystal.
